# Supplementary material
Source: PubMed Central journal article supplement (PMC6057809)
Supplement: NIHMS941948-supplement.pdf [file NIHMS941948-supplement.pdf]

Table S1. Risk for Kidney Disease Outcomes by Category of Daily Coffee Consumption Stratified by Race

|                                                            |                    | Coffee Consumption Levels <sup>a</sup> |                                 |                                 |                        |                |  |
|------------------------------------------------------------|--------------------|----------------------------------------|---------------------------------|---------------------------------|------------------------|----------------|--|
|                                                            | Never<br>(N=1,753) | <1 cup/day<br>(N=2,103)                | ≥1 to <2<br>cups/d<br>(N=2,517) | ≥2 to <3<br>cups/d<br>(N=1,766) | ≥3 cups/d<br>(N=2,552) | P for<br>trend |  |
| <b>Whites</b>                                              |                    |                                        |                                 |                                 |                        |                |  |
| <b>Chronic Kidney Disease<br/>(composite definition)</b>   | 1 (ref.)           | 0.95<br>(0.84-1.07)                    | 0.92<br>(0.82-1.04)             | 0.89<br>(0.78-1.01)             | 0.85<br>(0.75-0.96)    | 0.01           |  |
| <b>Chronic Kidney Disease<br/>(visit based definition)</b> | 1 (ref.)           | 1.08<br>(0.92-1.26)                    | 1.02<br>(0.88-1.19)             | 0.98<br>(0.82-1.16)             | 0.84<br>(0.71-0.99)    | <0.001         |  |
| <b>End Stage Renal Disease</b>                             | 1 (ref.)           | 0.76<br>(0.46-1.24)                    | 0.68<br>(0.41-1.12)             | 0.69<br>(0.39-1.22)             | 0.70<br>(0.41-1.20)    | 0.4            |  |
| <b>Kidney Failure</b>                                      | 1 (ref.)           | 0.75<br>(0.56-1.01)                    | 0.77<br>(0.58-1.02)             | 0.89<br>(0.66-1.21)             | 0.84<br>(0.62-1.13)    | 0.9            |  |
| <b>Blacks</b>                                              |                    |                                        |                                 |                                 |                        |                |  |
| <b>Chronic Kidney Disease<br/>(composite definition)</b>   | 1 (ref.)           | 0.83<br>(0.70-0.99)                    | 0.92<br>(0.78-1.09)             | 0.92<br>(0.73-1.17)             | 1.06<br>(0.79-1.42)    | 0.7            |  |
| <b>Chronic Kidney Disease<br/>(visit based definition)</b> | 1 (ref.)           | 0.93<br>(0.73-1.19)                    | 0.94<br>(0.74-1.20)             | 1.16<br>(0.80-1.69)             | 0.87<br>(0.56-1.34)    | 0.7            |  |
| <b>End Stage Renal Disease</b>                             | 1 (ref.)           | 1.00<br>(0.63-1.60)                    | 1.03<br>(0.66-1.61)             | 1.09<br>(0.58-2.07)             | 1.53<br>(0.73-3.24)    | 0.3            |  |
| <b>Kidney Failure</b>                                      | 1 (ref.)           | 0.73<br>(0.54-1.00)                    | 0.89<br>(0.66-1.19)             | 1.01<br>(0.67-1.52)             | 1.13<br>(0.67-1.89)    | 0.4            |  |

Note: Unless otherwise indicated, values given as hazard ratio (95% confidence interval). Model: Adjusted for age, sex, race-center, education, total energy intake, physical activity, smoking, alcohol status, DASH diet score, diabetes status, BMI, systolic blood pressure, anti-hypertensive medication use, baseline eGFR.

<sup>a</sup>Average of visit 1 and visit 3 coffee intake calculated for participants with no ESRD or kidney failure events or with ESRD or kidney failure event after visit 3; visit 1 coffee intake used for participants with CKD event between visits 1 and 3.
